# Supplementary material for: Direct Cryo-ET observation of platelet deformation induced by SARS-CoV-2 Spike protein
Source: PubMed Central journal article supplement (PMC9709796; doi:10.1101/2022.11.22.517574), 2022-11-23

**A**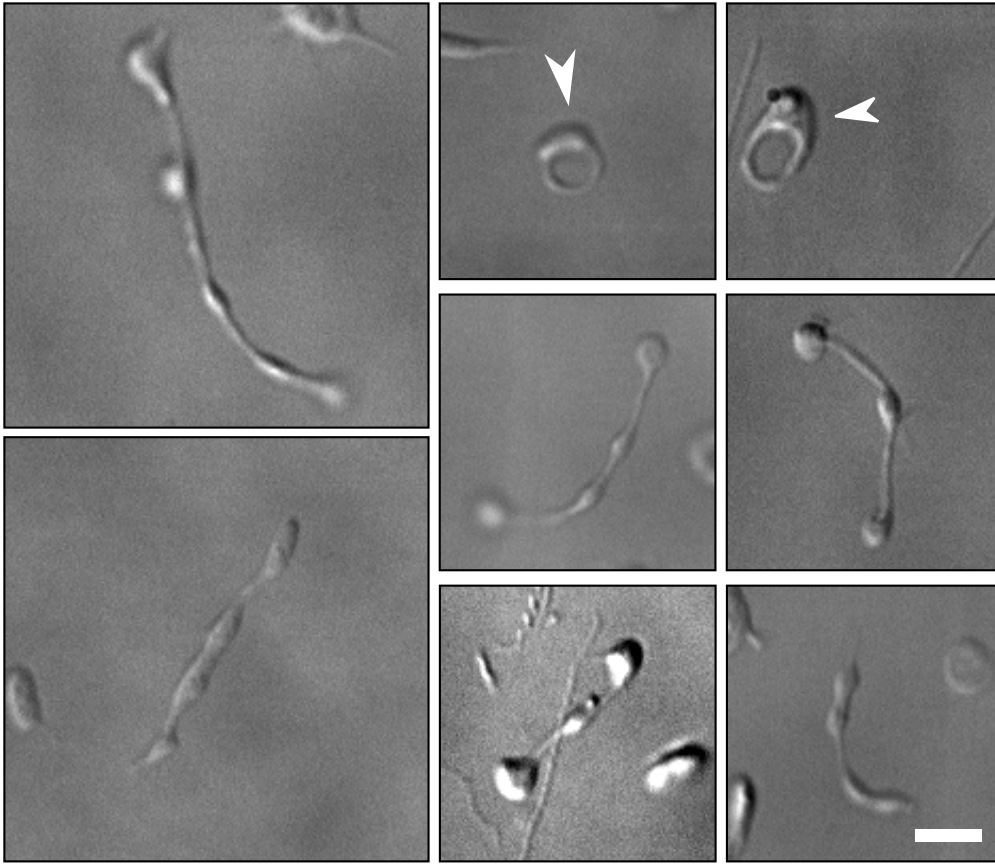**B**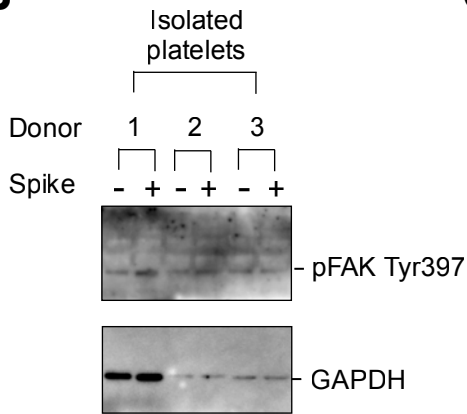**C**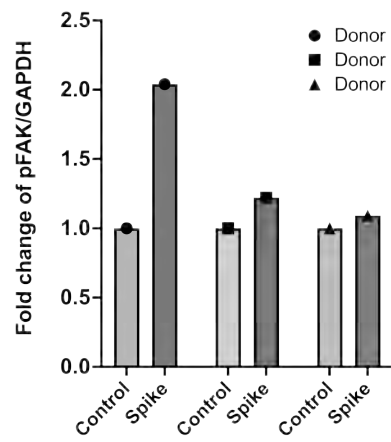**D**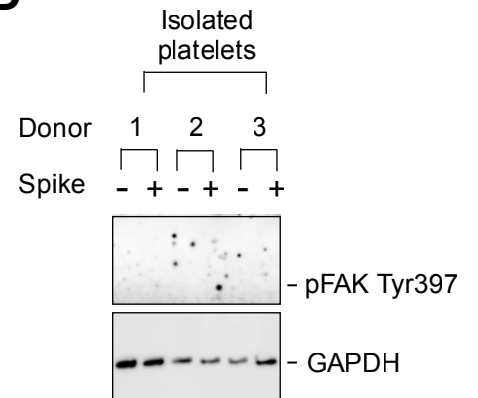

**A**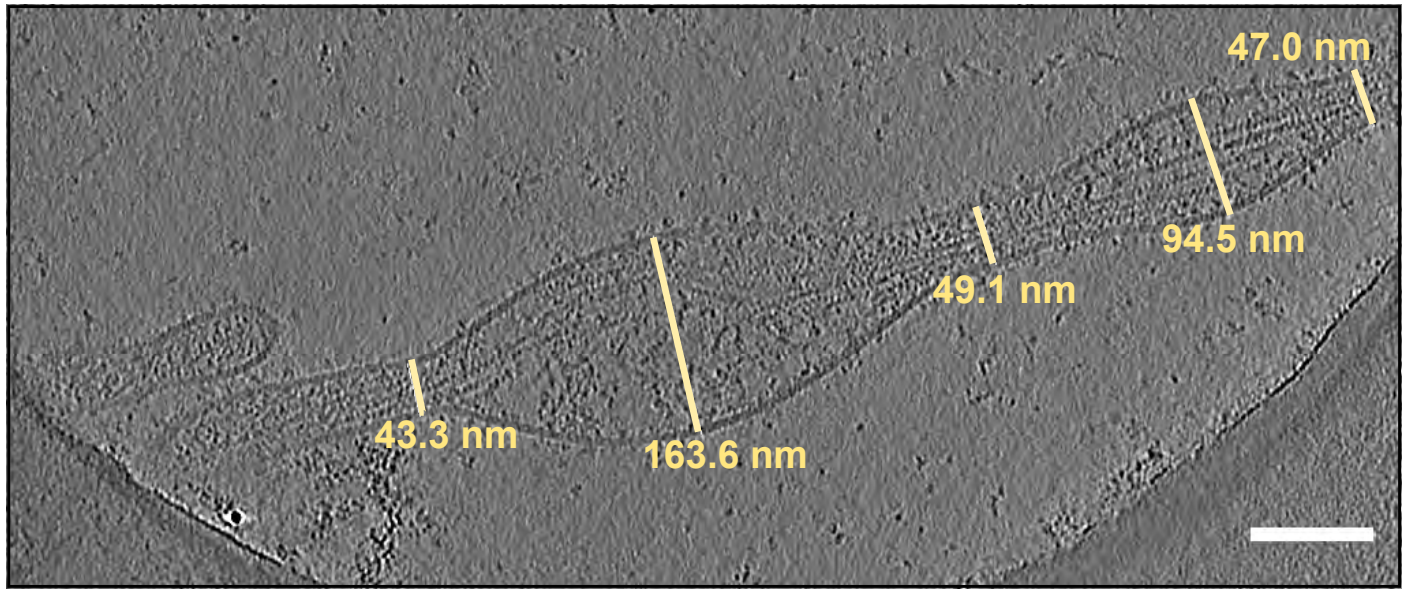**B**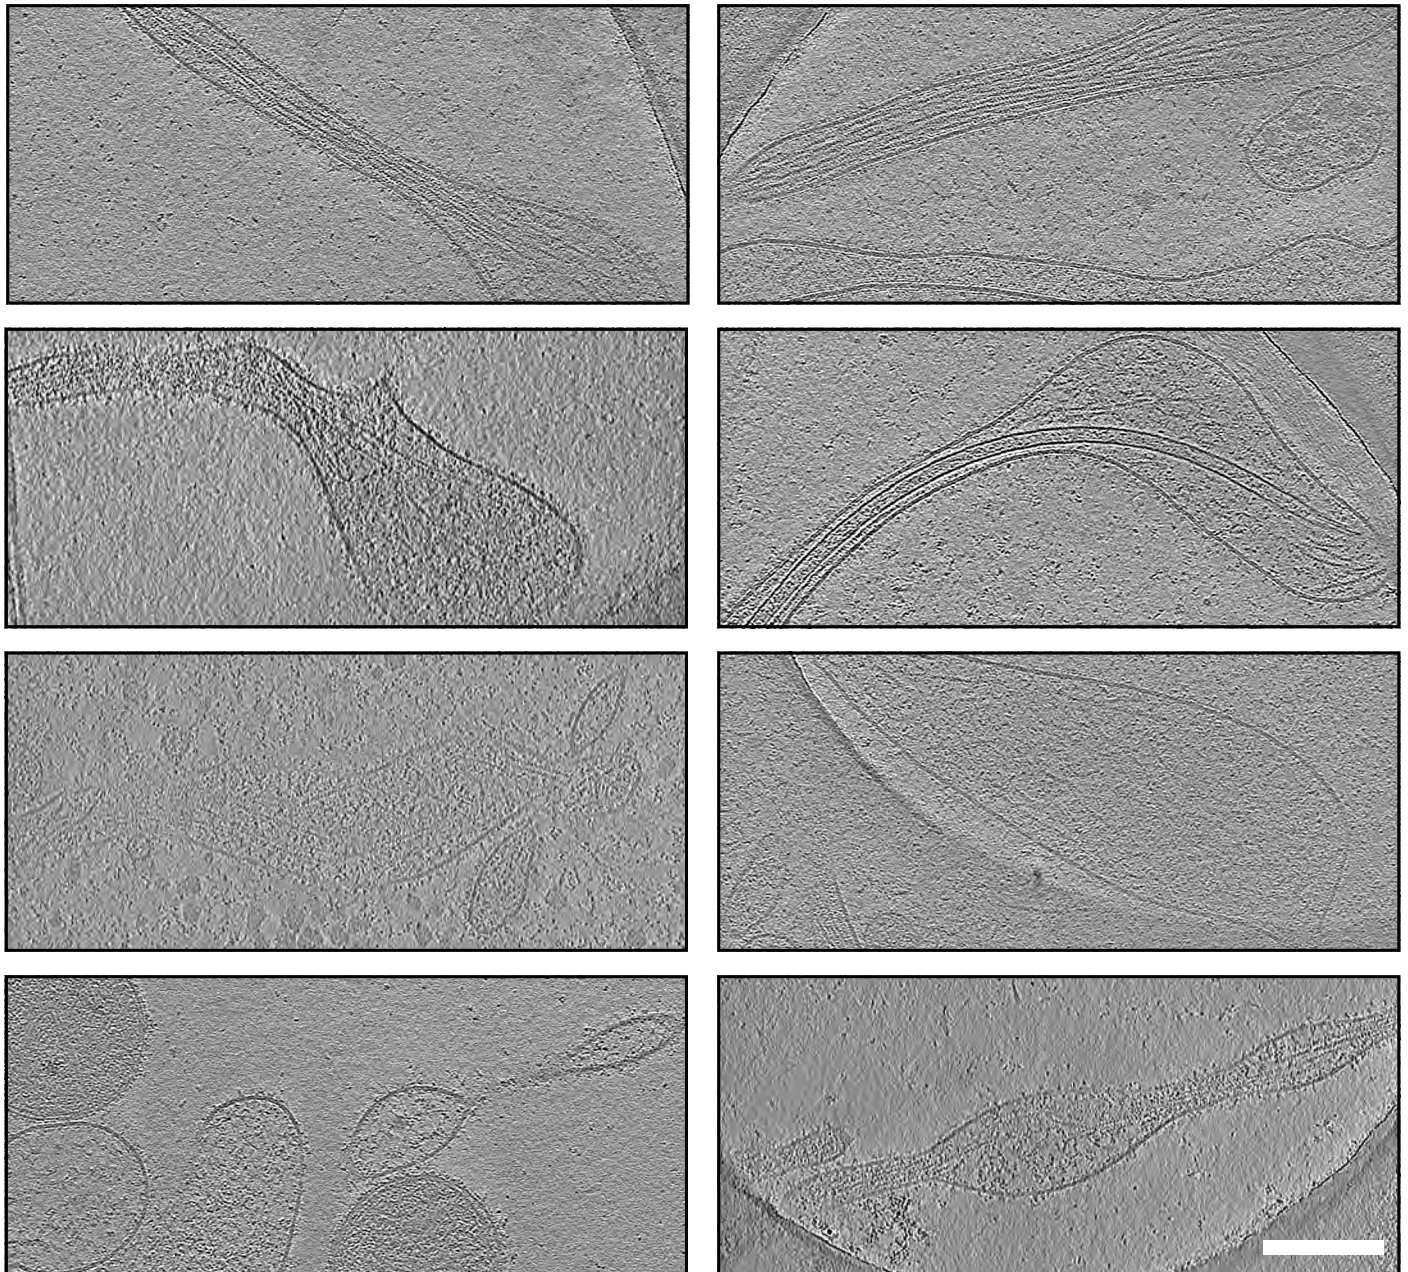

## A Open Form

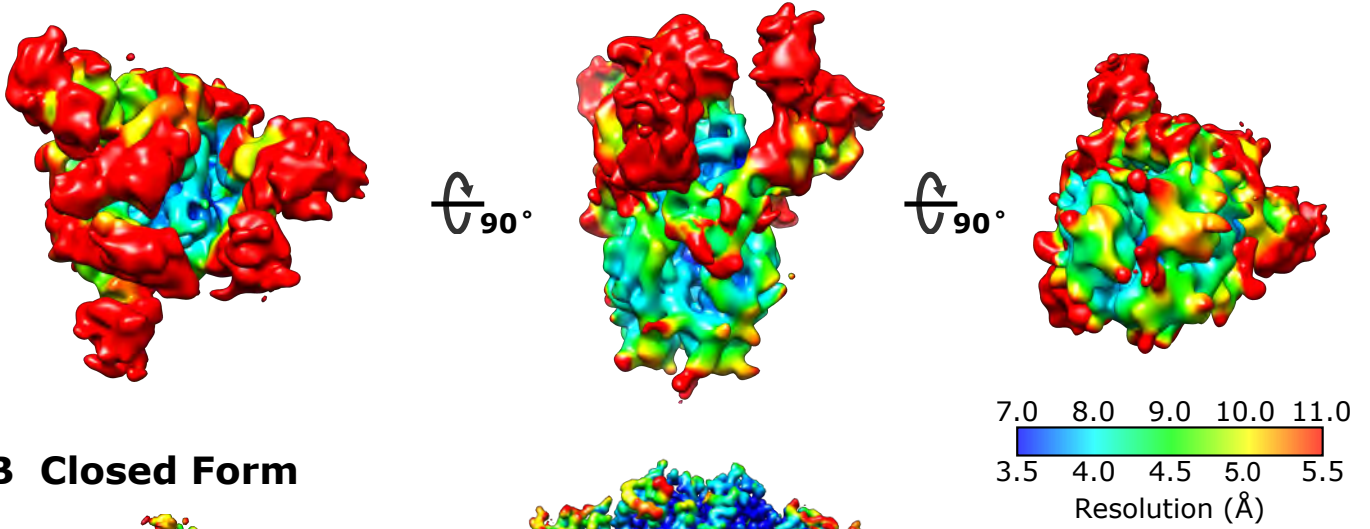

## B Closed Form

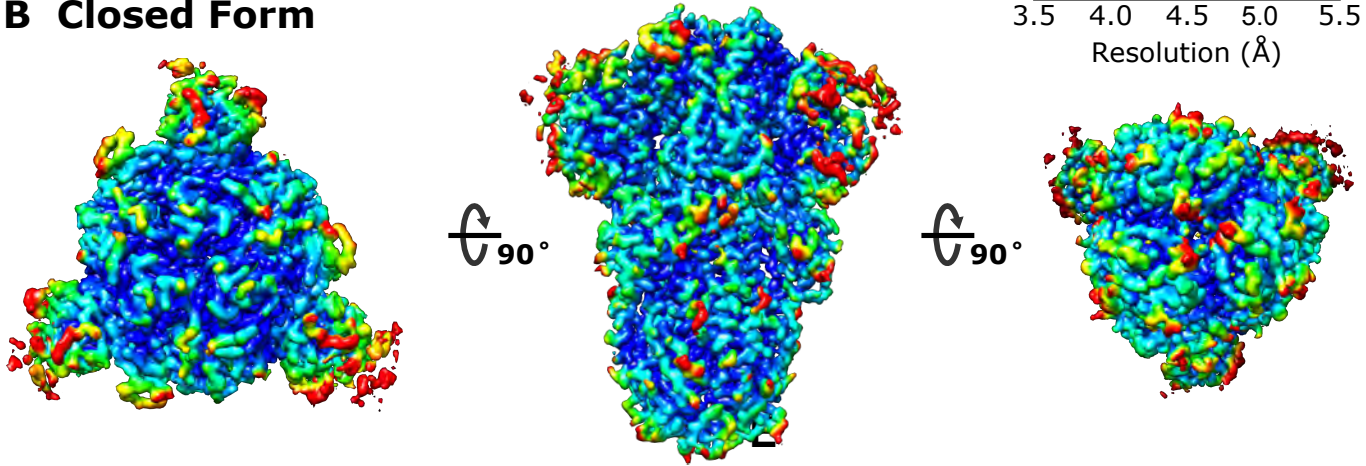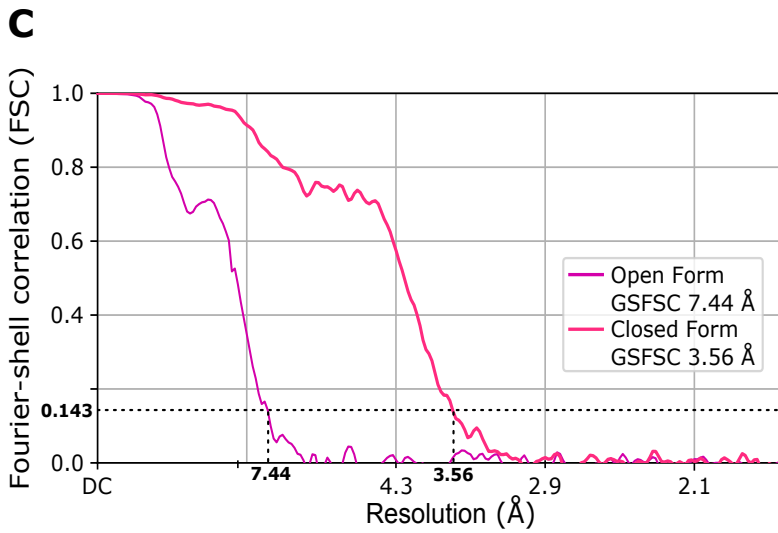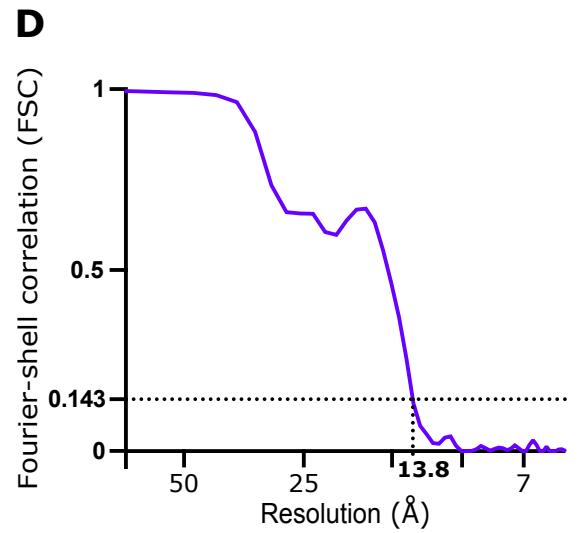

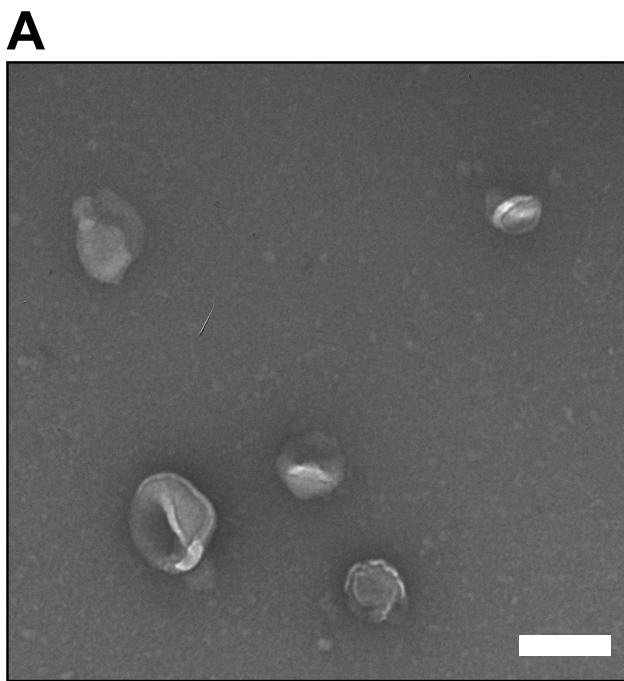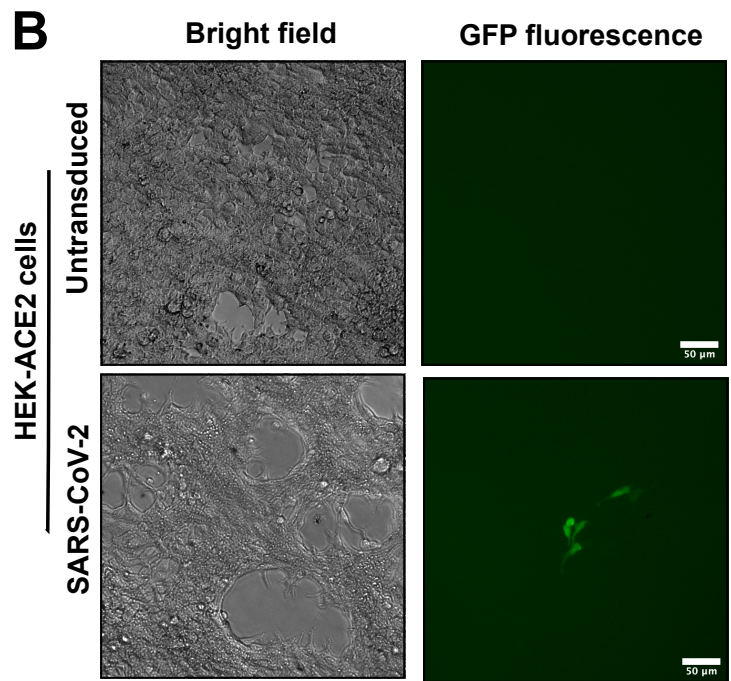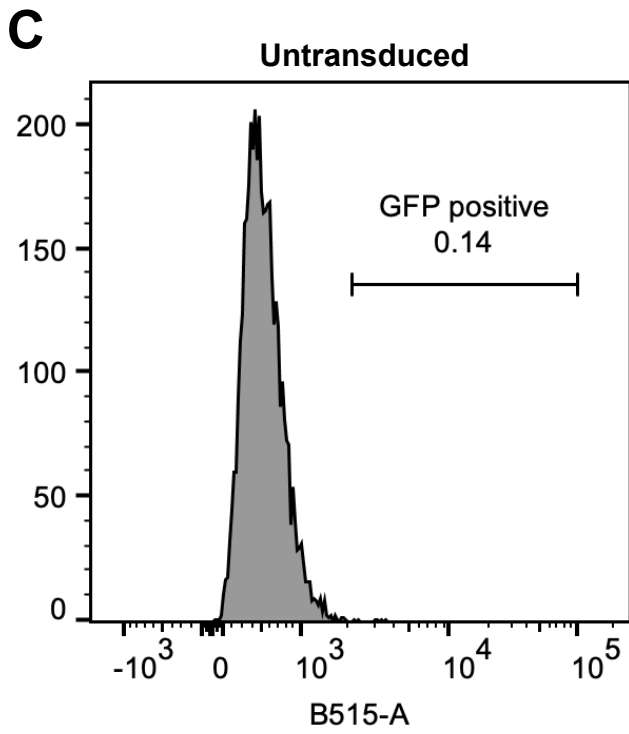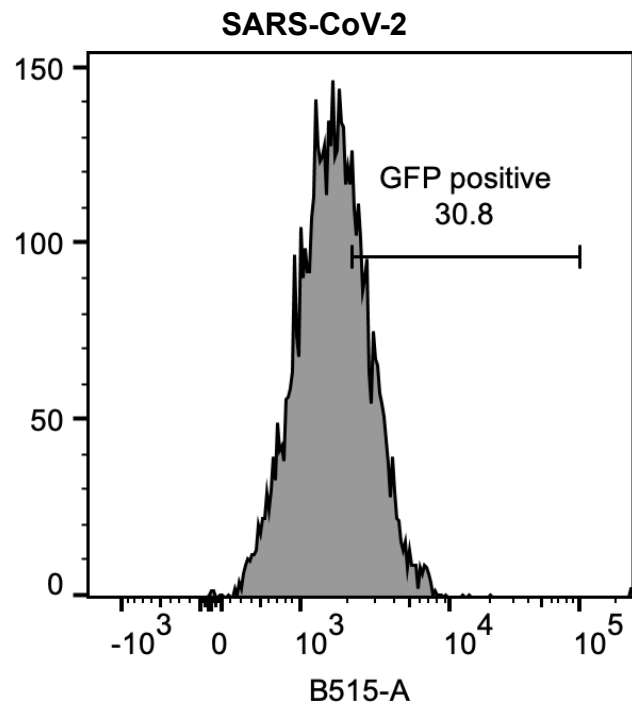

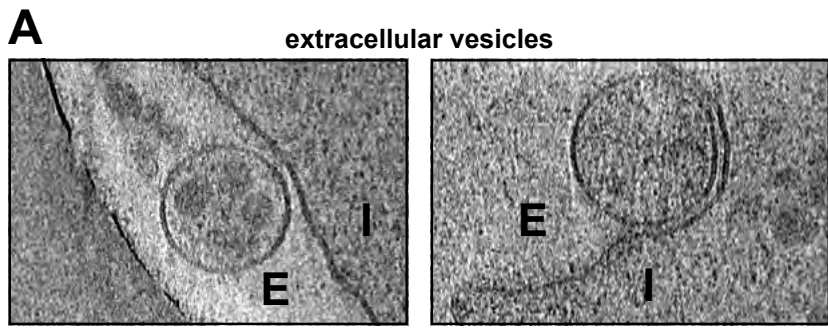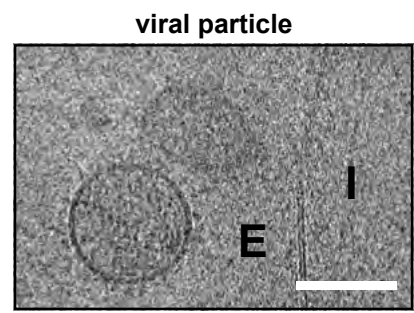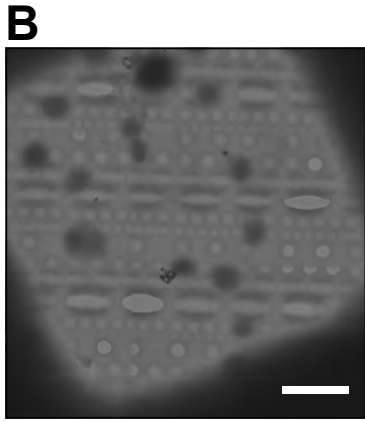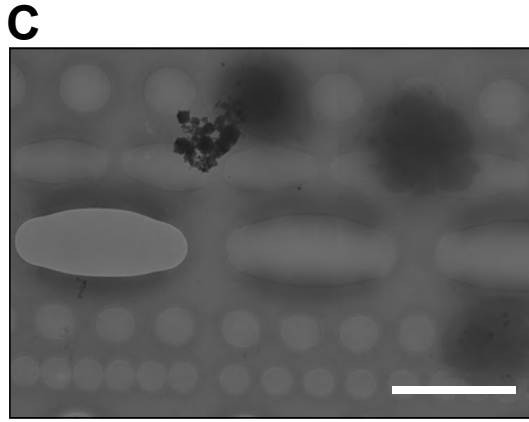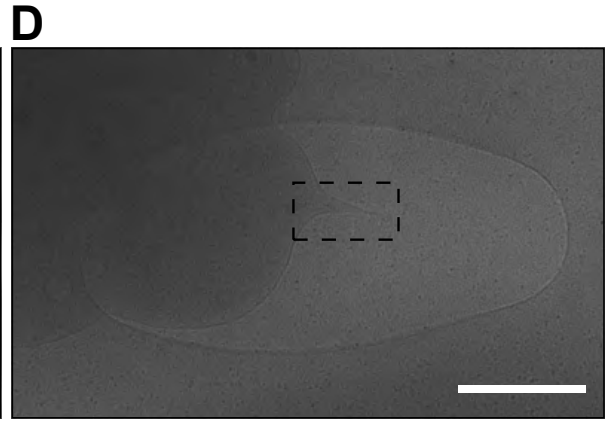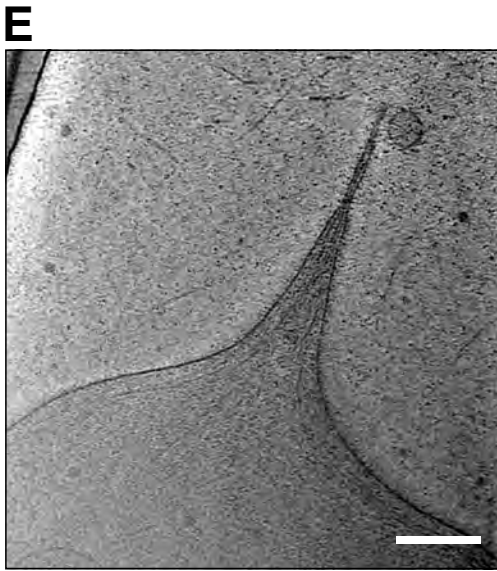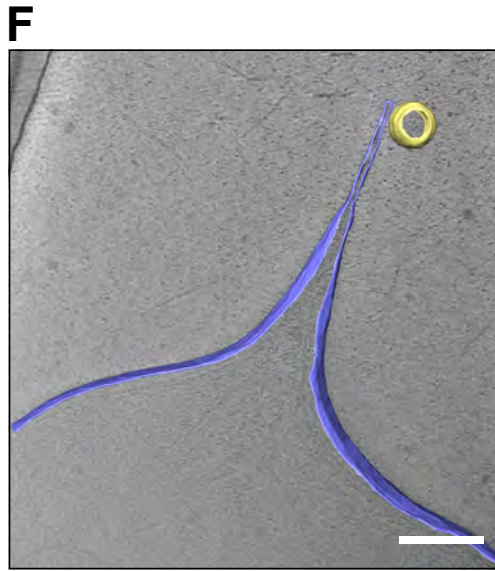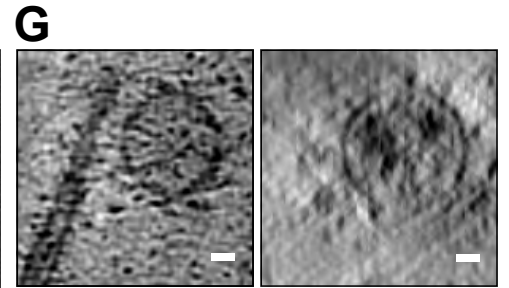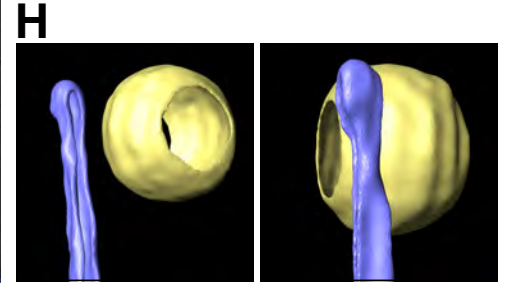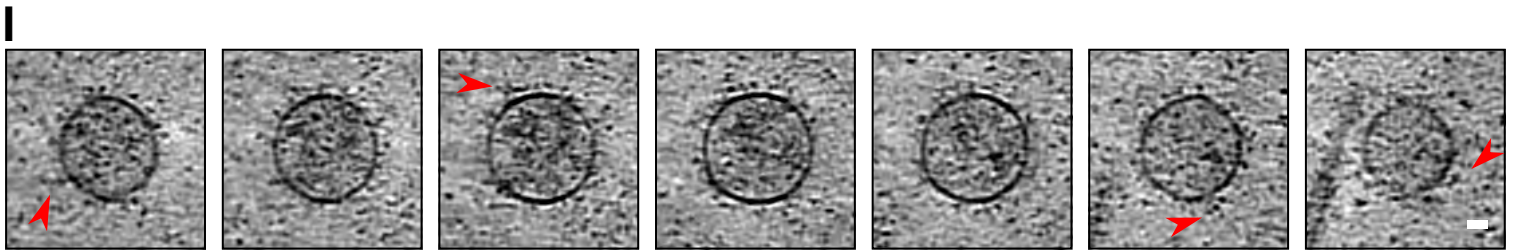

Supplement: media-1.pdf [file media-1.pdf]
